# Supplementary material
Source: publisher site journal article supplement (https://www.spandidos-publications.com/7321/downloadSupplementary)
Supplement: Supplementary file 1 [file downloadSupplementary]

## Sheet: Sheet1
Table SIII. Cell type-specific biomarkers.
cell_type	marker
Epithelial cells	EPCAM	CDH1	CLU
T cells	CD3D
Macrophage	CD68
B cells	IGKC	CD79A	MS4A1
Fibroblasts	IGFBP7	COL1A2	TAGLN
Endothelial cells	RAMP2	TIMP3
Myeloid cells	TYROBP	FCER1G
